# Supplementary material for: The first structural examples of tricitratotitanate [Ti(H2cit)3]2? dianionsElectronic supplementary information (ESI) available: 13C NMR spectra, thermogravimetric analysis and powder X-ray diagram. See http://www.rsc.org/suppdata/dt/b3/b304358d/
Source: Royal Society of Chemistry journal article supplement (doi:10.1039/b304358d), 2003-01-01

## Supporting Information

**Fig. 1** Solution  $^{13}\text{C}$  NMR spectra of tricitrato titanates ( $\text{D}_2\text{O}$ ). **1**:  $\text{K}_2[\text{Ti}(\text{H}_2\text{cit})_3]\cdot 4\text{H}_2\text{O}$  (down), **2**:  $\text{KMg}_{1/2}[\text{Ti}(\text{H}_2\text{cit})_3]\cdot 6\text{H}_2\text{O}$  (middle), **3**:  $(\text{NH}_4)\text{Mg}_{1/2}[\text{Ti}(\text{H}_2\text{cit})_3]\cdot 6\text{H}_2\text{O}$  (middle), **4**:  $\text{Ba}[\text{Ti}(\text{H}_2\text{cit})_3]\cdot 4\text{H}_2\text{O}$  (up)

**Fig. 2:** DTA and TG diagrams of  $\text{Ba}[\text{Ti}(\text{H}_2\text{cit})_3]\cdot 4\text{H}_2\text{O}$  **4**

**Fig. 3:** X-ray diffractogram of  $\text{Ba}[\text{Ti}(\text{H}_2\text{cit})_3]\cdot 4\text{H}_2\text{O}$  **4** heated at  $700^\circ\text{C}$  for two hours

*Physical Measurements.* Infrared spectra were recorded as Nujol mulls between KBr plates on a Nicolet 360 FT-IR spectrometer. Elemental analyses were performed with an EA 1100 elemental analyzer;  $^1\text{H}$ -NMR and  $^{13}\text{C}$ -NMR spectra were recorded on Varian UNITY 500 and 300 NMR spectrometers. The TG-DTA measurements were conducted on a Netzsch STA 409EP thermal analysis system with a heating rate  $5^\circ\text{C}/\text{min}$  over the  $25 - 700^\circ\text{C}$  range. The powder diffractogram was recorded on a Rigaku D/Max-C powder diffractometer equipped with  $\text{Cu-K}\alpha$  radiation.

Figure 1

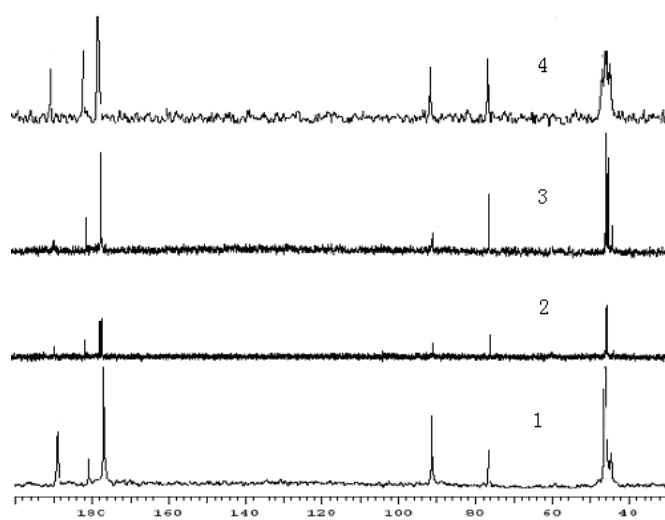

Figure 2

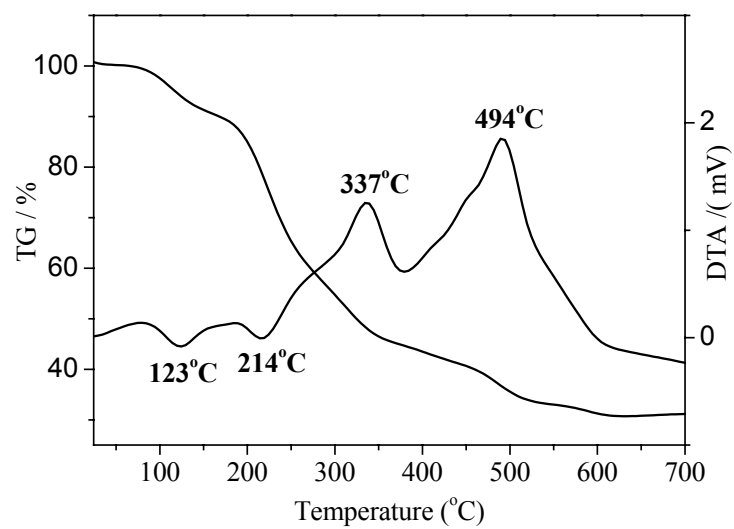

Figure 3

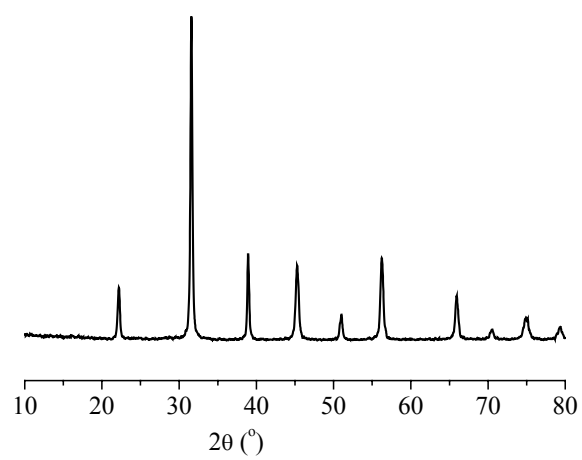

Supplement: esi.pdf [file esi.pdf]
